# Supplementary material
Source: publisher figshare collection journal article supplement (https://geolsoc.figshare.com/ndownloader/files/11294486)
Supplement: Supplementary file 1 [file 11294486]

## Sheet: Foglio1
Data from concretion hand specimen
Sample n°	Sample name	Stratigraphic position	Concretion type	d13C (‰ VPDB)	d18O (‰ VPDB)
1	SP1.MT C1	Argille Azzurre Fm.	Chimney methane-related	-21.8188	2.81898
2	SP1.MT C2	Argille Azzurre Fm.	Chimney methane-related	-31.5123	3.06756
3	SP1.MT C3	Argille Azzurre Fm.	Chimney methane-related	-35.0818	3.67737
4	SP1.MT C4	Argille Azzurre Fm.	Chimney methane-related	-38.476	4.52125
5	SP1.MT C5	Argille Azzurre Fm.	Chimney methane-related	-39.0347	4.66251
6	SP1.MT C6	Argille Azzurre Fm.	Chimney methane-related	-38.9776	4.44189
7	SP1.MT C7	Argille Azzurre Fm.	Chimney methane-related	-36.8369	5.07323
8	SP1.MT C8	Argille Azzurre Fm.	Chimney methane-related	-39.1874	4.84051
9	SP1.MT C9	Argille Azzurre Fm.	Chimney methane-related	-38.3556	4.91766
10	SP1.MT C10	Argille Azzurre Fm.	Chimney methane-related	-35.8869	4.05808
11	SP1.MT C11	Argille Azzurre Fm.	Chimney methane-related	-31.2829	3.15237
12	SP1.MT R1	Argille Azzurre Fm.	Chimney methane-related	-28.525	3.12584
13	SP1.MT R2	Argille Azzurre Fm.	Chimney methane-related	-34.6734	3.66947
14	SP1.MT R3	Argille Azzurre Fm.	Chimney methane-related	-41.2479	4.86502
15	SP1.MT R4	Argille Azzurre Fm.	Chimney methane-related	-39.4376	4.96031
16	SP1.MT R5	Argille Azzurre Fm.	Chimney methane-related	-39.808	5.04978
17	SP1.MT R6	Argille Azzurre Fm.	Chimney methane-related	-36.6899	5.09029
18	SP1.MT R7	Argille Azzurre Fm.	Chimney methane-related	-40.3198	4.73397
19	SP1.MT R8	Argille Azzurre Fm.	Chimney methane-related	-38.4141	4.88294
20	SP1.MT R9	Argille Azzurre Fm.	Chimney methane-related	-36.9772	4.68398
21	SP1.MT R10	Argille Azzurre Fm.	Chimney methane-related	-34.1045	3.63006
22	SP1.MT R11	Argille Azzurre Fm.	Chimney methane-related	-28.4487	3.3838
23	SP1.3C R1	Transition AZ-SI Fms.	Single elongate	-4.62782	-5.93012
24	SP1.3C R2	Transition AZ-SI Fms.	Single elongate	-3.85428	-5.53978
25	SP1.3C R3	Transition AZ-SI Fms.	Single elongate	-5.60044	-6.17657
26	SP1.3C R4	Transition AZ-SI Fms.	Single elongate	-6.34572	-6.2324
27	SP1.3C R5	Transition AZ-SI Fms.	Single elongate	-5.50925	-6.22911
28	SP1.3C R6	Transition AZ-SI Fms.	Single elongate	-5.49418	-5.93881
29	SP1.3C R7	Transition AZ-SI Fms.	Single elongate	-5.93618	-6.03753
30	SP1.3C R8	Transition AZ-SI Fms.	Single elongate	-5.90611	-5.90122
31	SP1.3C R9	Transition AZ-SI Fms.	Single elongate	-5.37941	-5.9559
32	SP1.3C R10	Transition AZ-SI Fms.	Single elongate	-6.49675	-6.05554
33	SP1.3C C1	Transition AZ-SI Fms.	Single elongate	-6.58868	-6.2167
34	SP1.3C C2	Transition AZ-SI Fms.	Single elongate	-6.39312	-5.97459
35	SP1.3C C3	Transition AZ-SI Fms.	Single elongate	-6.69187	-6.11341
36	SP1.3C C4	Transition AZ-SI Fms.	Single elongate	-6.53229	-6.18561
37	SP1.3C C5	Transition AZ-SI Fms.	Single elongate	-5.88221	-6.11541
38	SP1.3C C6	Transition AZ-SI Fms.	Single elongate	-6.25324	-6.65586
39	SP1.3C C7	Transition AZ-SI Fms.	Single elongate	-5.67927	-5.84728
40	SP1.3C C8	Transition AZ-SI Fms.	Single elongate	-4.69139	-5.53184
41	SP1.11C R1	Transition AZ-SI Fms.	Tabular	-10.0184	-6.23448
42	SP1.11C R2	Transition AZ-SI Fms.	Tabular	-10.34	-6.19685
43	SP1.11C R3	Transition AZ-SI Fms.	Tabular	-10.6806	-6.48349
44	SP1.11C R4	Transition AZ-SI Fms.	Tabular	-10.7176	-6.57434
45	SP1.11C R5	Transition AZ-SI Fms.	Tabular	-10.7324	-6.67789
46	SP1.11C R6	Transition AZ-SI Fms.	Tabular	-10.685	-6.56523
47	SP1.11C R7	Transition AZ-SI Fms.	Tabular	-10.7163	-6.41647
48	SP1.11C R8	Transition AZ-SI Fms.	Tabular	-10.6538	-6.46211
49	SP1.11C R9	Transition AZ-SI Fms.	Tabular	-10.6675	-6.45807
50	SP1.11C R10	Transition AZ-SI Fms.	Tabular	-10.6013	-6.4607
51	SP1.11C C1	Transition AZ-SI Fms.	Tabular	-9.49099	-6.79531
52	SP1.11C C2	Transition AZ-SI Fms.	Tabular	-10.3557	-6.40523
53	SP1.11C C3	Transition AZ-SI Fms.	Tabular	-10.6558	-6.57384
54	SP1.11C C4	Transition AZ-SI Fms.	Tabular	-10.6019	-6.46063
55	SP1.18C R1	Base Sabbie di Imola Fm.	Tabular	-4.47531	-5.91126
56	SP1.18C R2	Base Sabbie di Imola Fm.	Tabular	-5.89668	-6.34933
57	SP1.18C R3	Base Sabbie di Imola Fm.	Tabular	-5.38083	-6.37415
58	SP1.18C R4	Base Sabbie di Imola Fm.	Tabular	-5.37578	-6.64144
59	SP1.18C R5	Base Sabbie di Imola Fm.	Tabular	-5.22923	-6.64706
60	SP1.18C R6	Base Sabbie di Imola Fm.	Tabular	-5.45051	-6.64442
61	SP1.18C R7	Base Sabbie di Imola Fm.	Tabular	-5.03738	-6.23715
62	SP1.18C R8	Base Sabbie di Imola Fm.	Tabular	-4.27983	-6.05483
63	SP1.18C R9	Base Sabbie di Imola Fm.	Tabular	-5.23874	-6.54481
64	SP1.18C R10	Base Sabbie di Imola Fm.	Tabular	-5.63066	-6.35936
65	SP1.18C C1	Base Sabbie di Imola Fm.	Tabular	-6.22422	-6.54304
66	SP1.18C C2	Base Sabbie di Imola Fm.	Tabular	-6.01805	-6.88759
67	SP1.18C C3	Base Sabbie di Imola Fm.	Tabular	-5.94593	-6.81458
68	SP1.18C C4	Base Sabbie di Imola Fm.	Tabular	-5.60088	-6.94786
69	SP1.18C C5	Base Sabbie di Imola Fm.	Tabular	-5.40711	-6.80867
70	SP1.18C C6	Base Sabbie di Imola Fm.	Tabular	-4.42125	-6.10244
71	SP1.24C R1	Base Sabbie di Imola Fm.	Tabular	-5.00613	-6.95866
72	SP1.24C R2	Base Sabbie di Imola Fm.	Tabular	-5.07803	-7.1454
73	SP1.24C R3	Base Sabbie di Imola Fm.	Tabular	-5.25167	-7.30261
74	SP1.24C R4	Base Sabbie di Imola Fm.	Tabular	-4.7255	-7.02333
75	SP1.24C R5	Base Sabbie di Imola Fm.	Tabular	-5.2833	-7.21128
76	SP1.24C R6	Base Sabbie di Imola Fm.	Tabular	-5.70019	-7.29914
77	SP1.24C R7	Base Sabbie di Imola Fm.	Tabular	-4.93526	-7.16419
78	SP1.24C R8	Base Sabbie di Imola Fm.	Tabular	-4.8045	-7.232
79	SP1.24C R9	Base Sabbie di Imola Fm.	Tabular	-5.00932	-7.41742
80	SP1.24C R10	Base Sabbie di Imola Fm.	Tabular	-5.66329	-7.31192
81	SP1.24C C1	Base Sabbie di Imola Fm.	Tabular	-6.88898	-6.98958
82	SP1.24C C2	Base Sabbie di Imola Fm.	Tabular	-4.82876	-6.91156
83	SP1.24C C3	Base Sabbie di Imola Fm.	Tabular	-5.25026	-7.29326
84	SP1.24C C4	Base Sabbie di Imola Fm.	Tabular	-5.60832	-7.20029
85	SP1.24C C5	Base Sabbie di Imola Fm.	Tabular	-6.68646	-7.03542
86	SP1.24C C6	Base Sabbie di Imola Fm.	Tabular	-6.66759	-7.03606
87	SP1.27C R1	Base Sabbie di Imola Fm.	Tabular	-5.21958	-7.1273
88	SP1.27C R2	Base Sabbie di Imola Fm.	Tabular	-4.71526	-7.18783
89	SP1.27C R3	Base Sabbie di Imola Fm.	Tabular	-5.0874	-6.80004
90	SP1.27C R4	Base Sabbie di Imola Fm.	Tabular	-5.16691	-6.67443
91	SP1.27C R5	Base Sabbie di Imola Fm.	Tabular	-5.25705	-6.87436
92	SP1.27C R6	Base Sabbie di Imola Fm.	Tabular	-5.54695	-6.79353
93	SP1.27C R7	Base Sabbie di Imola Fm.	Tabular	-5.14884	-7.34496
94	SP1.27C R8	Base Sabbie di Imola Fm.	Tabular	-4.94084	-7.22838
95	SP1.27C R9	Base Sabbie di Imola Fm.	Tabular	-5.16157	-7.32363
96	SP1.27C R10	Base Sabbie di Imola Fm.	Tabular	-5.37429	-6.91227
97	SP1.27C R11	Base Sabbie di Imola Fm.	Tabular	-5.3176	-6.85609
98	SP1.27C R12	Base Sabbie di Imola Fm.	Tabular	-5.00021	-7.13635
99	SP1.27C R13	Base Sabbie di Imola Fm.	Tabular	-5.50744	-6.8599
100	SP1.27C R14	Base Sabbie di Imola Fm.	Tabular	-5.55014	-6.84435
101	SP1.27C R15	Base Sabbie di Imola Fm.	Tabular	-5.39438	-7.01764
102	SP1.27C C1	Base Sabbie di Imola Fm.	Tabular	-6.00593	-7.03377
103	SP1.27C C2	Base Sabbie di Imola Fm.	Tabular	-5.8391	-7.10603
104	SP1.27C C3	Base Sabbie di Imola Fm.	Tabular	-5.0073	-7.42738
105	SP1.27C C4	Base Sabbie di Imola Fm.	Tabular	-5.62234	-6.91843
106	SP1.27C C5	Base Sabbie di Imola Fm.	Tabular	-5.49807	-6.91703
107	SP1.28C R1	Middle Sabbie di Imola Fm.	Single elongate	-3.94892	-6.34979
108	SP1.28C R2	Middle Sabbie di Imola Fm.	Single elongate	-4.70641	-6.3575
109	SP1.28C R3	Middle Sabbie di Imola Fm.	Single elongate	-3.15658	-6.54549
110	SP1.28C R4	Middle Sabbie di Imola Fm.	Single elongate	-4.37637	-6.71727
111	SP1.28C R5	Middle Sabbie di Imola Fm.	Single elongate	-3.84119	-6.60847
112	SP1.28C R6	Middle Sabbie di Imola Fm.	Single elongate	-4.50461	-6.54756
113	SP1.28C R7	Middle Sabbie di Imola Fm.	Single elongate	-5.43712	-6.7577
114	SP1.28C R8	Middle Sabbie di Imola Fm.	Single elongate	-4.73948	-6.98908
115	SP1.28C C1	Middle Sabbie di Imola Fm.	Single elongate	-4.36926	-6.68478
116	SP1.28C C2	Middle Sabbie di Imola Fm.	Single elongate	-4.30055	-6.43795
117	SP1.28C C3	Middle Sabbie di Imola Fm.	Single elongate	-4.30377	-6.18213
118	SP1.28C C4	Middle Sabbie di Imola Fm.	Single elongate	-4.54585	-6.8512
119	SP1.31C R1	Middle Sabbie di Imola Fm.	Tabular	-7.38633	-6.91672
120	SP1.31C R2	Middle Sabbie di Imola Fm.	Tabular	-5.69669	-6.86064
121	SP1.31C R3	Middle Sabbie di Imola Fm.	Tabular	-5.34305	-6.50437
122	SP1.31C R4	Middle Sabbie di Imola Fm.	Tabular	-7.39001	-6.79369
123	SP1.31C R5	Middle Sabbie di Imola Fm.	Tabular	-7.51948	-7.0824
124	SP1.31C R6	Middle Sabbie di Imola Fm.	Tabular	-6.80056	-6.89027
125	SP1.31C R7	Middle Sabbie di Imola Fm.	Tabular	-6.9955	-6.94507
126	SP1.31C R8	Middle Sabbie di Imola Fm.	Tabular	-6.53144	-6.84482
127	SP1.31C R9	Middle Sabbie di Imola Fm.	Tabular	-6.91215	-6.93529
128	SP1.31C R10	Middle Sabbie di Imola Fm.	Tabular	-6.25368	-6.66889
129	SP1.31C C1	Middle Sabbie di Imola Fm.	Tabular	-5.48166	-7.11379
130	SP1.31C C2	Middle Sabbie di Imola Fm.	Tabular	-7.10288	-7.08148
131	SP1.31C C3	Middle Sabbie di Imola Fm.	Tabular	-7.31424	-7.02234
132	SP1.31C C4	Middle Sabbie di Imola Fm.	Tabular	-7.48898	-6.95319
133	SP1.31C C5	Middle Sabbie di Imola Fm.	Tabular	-8.25849	-6.63064
134	SP1.31C C6	Middle Sabbie di Imola Fm.	Tabular	-8.70445	-6.60523
135	SP1.31C C7	Middle Sabbie di Imola Fm.	Tabular	-8.54262	-6.9436
136	SP1.31C C8	Middle Sabbie di Imola Fm.	Tabular	-8.20731	-6.69259
137	SP1.33C R1	Middle Sabbie di Imola Fm.	Nodular	-2.54892	-5.97405
138	SP1.33C R2	Middle Sabbie di Imola Fm.	Nodular	-6.05236	-6.3728
139	SP1.33C R3	Middle Sabbie di Imola Fm.	Nodular	-3.08632	-5.78033
140	SP1.33C R4	Middle Sabbie di Imola Fm.	Nodular	-2.74102	-6.00617
141	SP1.33C R5	Middle Sabbie di Imola Fm.	Nodular	-4.98344	-6.2261
142	SP1.33C R6	Middle Sabbie di Imola Fm.	Nodular	-4.94202	-6.49971
143	SP1.33C R7	Middle Sabbie di Imola Fm.	Nodular	-3.79531	-5.82409
144	SP1.33C R8	Middle Sabbie di Imola Fm.	Nodular	-2.90665	-6.09621
145	SP1.33C C1	Middle Sabbie di Imola Fm.	Nodular	-5.24886	-6.33543
146	SP1.33C C2	Middle Sabbie di Imola Fm.	Nodular	-4.62616	-6.59768
147	SP1.33C C3	Middle Sabbie di Imola Fm.	Nodular	-5.26016	-6.56088
148	SP1.33C C4	Middle Sabbie di Imola Fm.	Nodular	-3.20468	-6.29477
149	SP1.33C C5	Middle Sabbie di Imola Fm.	Nodular	-4.29496	-6.51908
150	SP1.33C C6	Middle Sabbie di Imola Fm.	Nodular	-4.91799	-6.66615
151	SP1.33C C7	Middle Sabbie di Imola Fm.	Nodular	-6.46286	-6.55729
152	SP1.33C C8	Middle Sabbie di Imola Fm.	Nodular	-5.42916	-6.83591
153	SP1.34C R1	Top Sabbie di Imola Fm.	Coalescent elongate	-6.69328	-7.07036
154	SP1.34C R2	Top Sabbie di Imola Fm.	Coalescent elongate	-6.66548	-6.92448
155	SP1.34C R3	Top Sabbie di Imola Fm.	Coalescent elongate	-6.49126	-7.10127
156	SP1.34C R4	Top Sabbie di Imola Fm.	Coalescent elongate	-6.86922	-6.97152
157	SP1.34C R5	Top Sabbie di Imola Fm.	Coalescent elongate	-6.44183	-6.78367
158	SP1.34C R6	Top Sabbie di Imola Fm.	Coalescent elongate	-6.42854	-7.10909
159	SP1.34C R7	Top Sabbie di Imola Fm.	Coalescent elongate	-6.60763	-7.15521
160	SP1.34C R8	Top Sabbie di Imola Fm.	Coalescent elongate	-6.76706	-6.90652
161	SP1.34C R9	Top Sabbie di Imola Fm.	Coalescent elongate	-6.77863	-7.03224
162	SP1.34C R10	Top Sabbie di Imola Fm.	Coalescent elongate	-6.47705	-7.18863
163	SP1.34C C1	Top Sabbie di Imola Fm.	Coalescent elongate	-6.15642	-6.84464
164	SP1.34C C2	Top Sabbie di Imola Fm.	Coalescent elongate	-6.33563	-7.02021
165	SP1.34C C3	Top Sabbie di Imola Fm.	Coalescent elongate	-6.6219	-7.16951
166	SP1.38C R1	Top Sabbie di Imola Fm.	Coalescent elongate	-4.74413	-6.49387
167	SP1.38C R2	Top Sabbie di Imola Fm.	Coalescent elongate	-4.87006	-6.66846
168	SP1.38C R3	Top Sabbie di Imola Fm.	Coalescent elongate	-4.48104	-6.52336
169	SP1.38C R4	Top Sabbie di Imola Fm.	Coalescent elongate	-4.97009	-6.94817
170	SP1.38C R5	Top Sabbie di Imola Fm.	Coalescent elongate	-4.51252	-6.57281
171	SP1.38C R6	Top Sabbie di Imola Fm.	Coalescent elongate	-4.77815	-6.97107
172	SP1.38C R7	Top Sabbie di Imola Fm.	Coalescent elongate	-4.59143	-6.85384
173	SP1.38C R8	Top Sabbie di Imola Fm.	Coalescent elongate	-4.701	-6.4565
174	SP1.38C R9	Top Sabbie di Imola Fm.	Coalescent elongate	-5.06576	-6.98318
175	SP1.38C R10	Top Sabbie di Imola Fm.	Coalescent elongate	-5.04303	-7.18421
176	SP1.38C R11	Top Sabbie di Imola Fm.	Coalescent elongate	-4.66631	-6.91779
177	SP1.38C R12	Top Sabbie di Imola Fm.	Coalescent elongate	-4.68306	-6.59495
178	SP1.38C R13	Top Sabbie di Imola Fm.	Coalescent elongate	-5.06957	-7.12424
179	SP1.38C C1	Top Sabbie di Imola Fm.	Coalescent elongate	-5.11242	-6.28286
180	SP1.38C C2	Top Sabbie di Imola Fm.	Coalescent elongate	-5.2218	-6.54155
181	SP1.38C C3	Top Sabbie di Imola Fm.	Coalescent elongate	-4.87613	-6.6196
182	SP1.38C C4	Top Sabbie di Imola Fm.	Coalescent elongate	-4.78714	-6.89212
183	SP1.38C C5	Top Sabbie di Imola Fm.	Coalescent elongate	-4.72932	-6.82238
184	SP1.38C C6	Top Sabbie di Imola Fm.	Coalescent elongate	-6.25091	-6.64555
